# Supplementary material for: Cyclometalated Ir(iii) complexes containing quinoline–benzimidazole-based N^N ancillary ligands: structural and luminescence modulation by varying the substituent groups or the protonation/deprotonation state of imidazole units
Source: Royal Society of Chemistry journal article supplement (doi:10.1039/c6dt04091h), 2016-11-29
Supplement: c6dt04091h1.pdf [file c6dt04091h1.pdf]

## Supporting Information

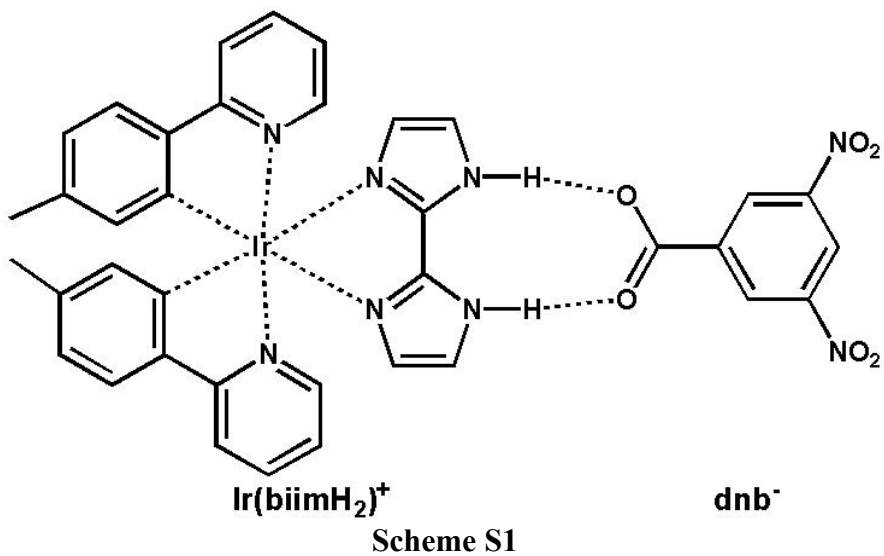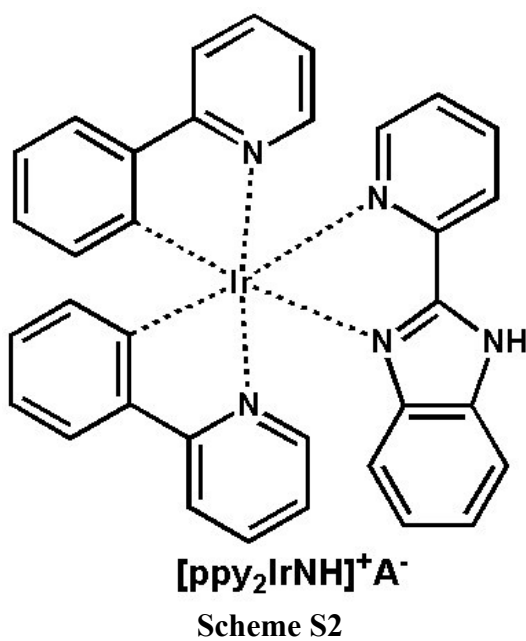

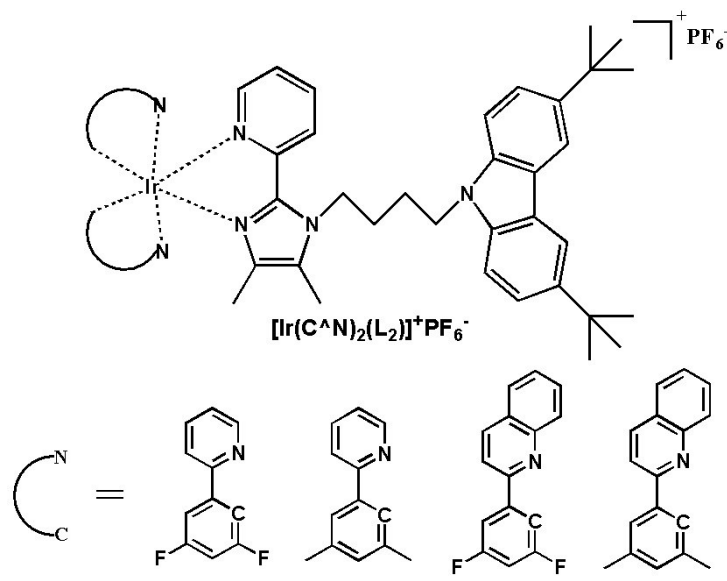

Scheme S3

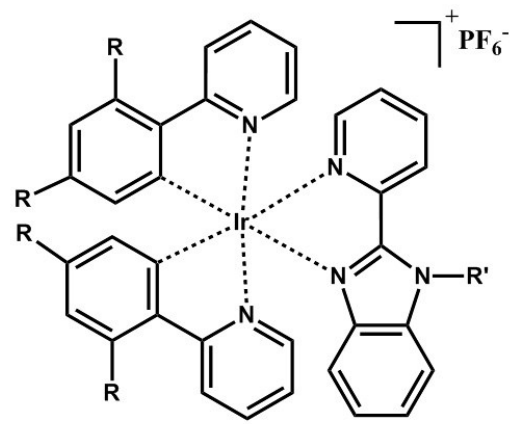

Scheme S4

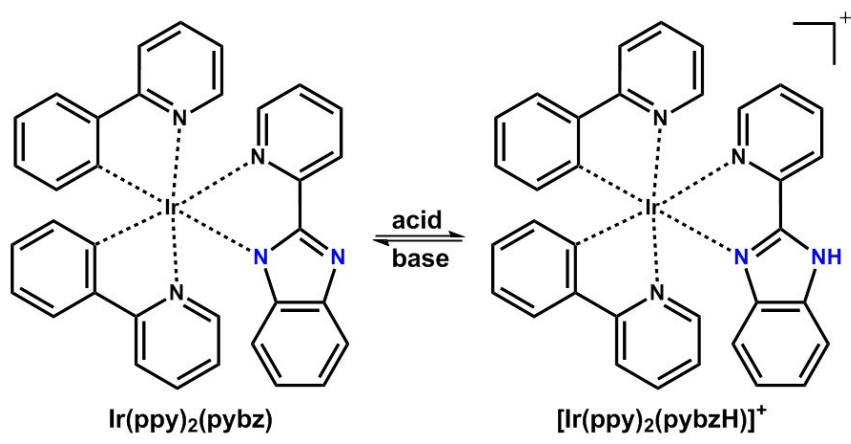

Scheme S5

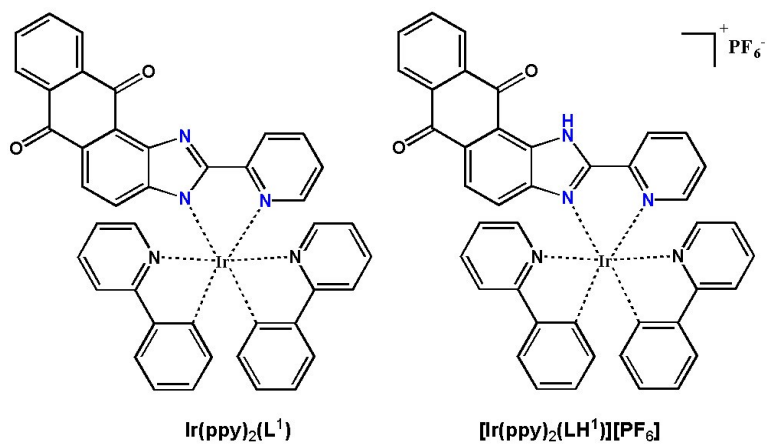

Scheme S6

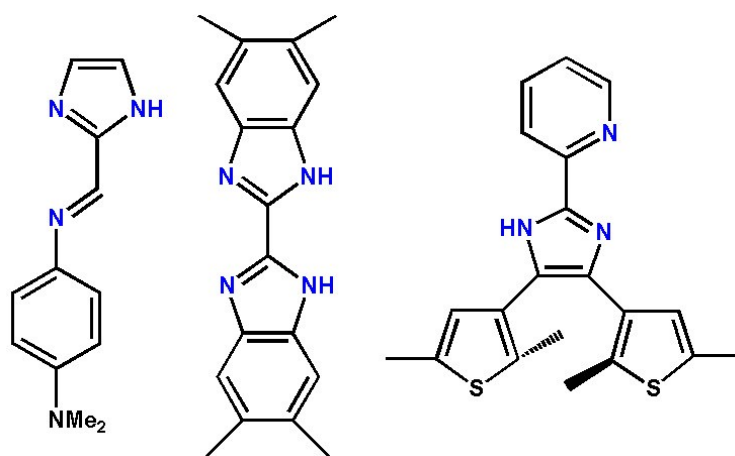

Scheme S7

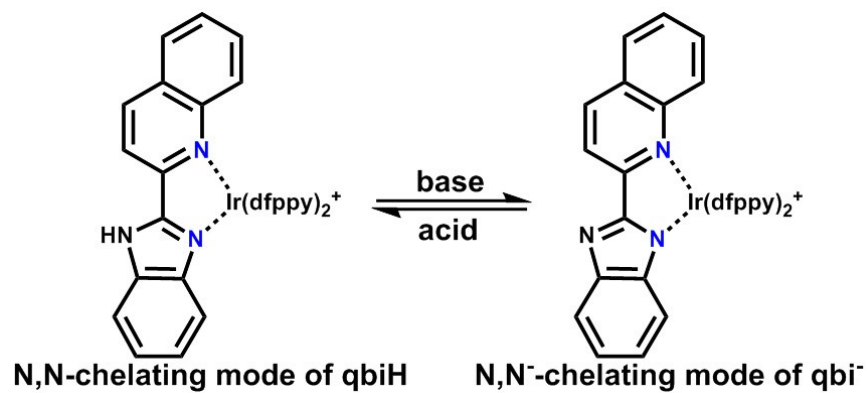

Scheme S8

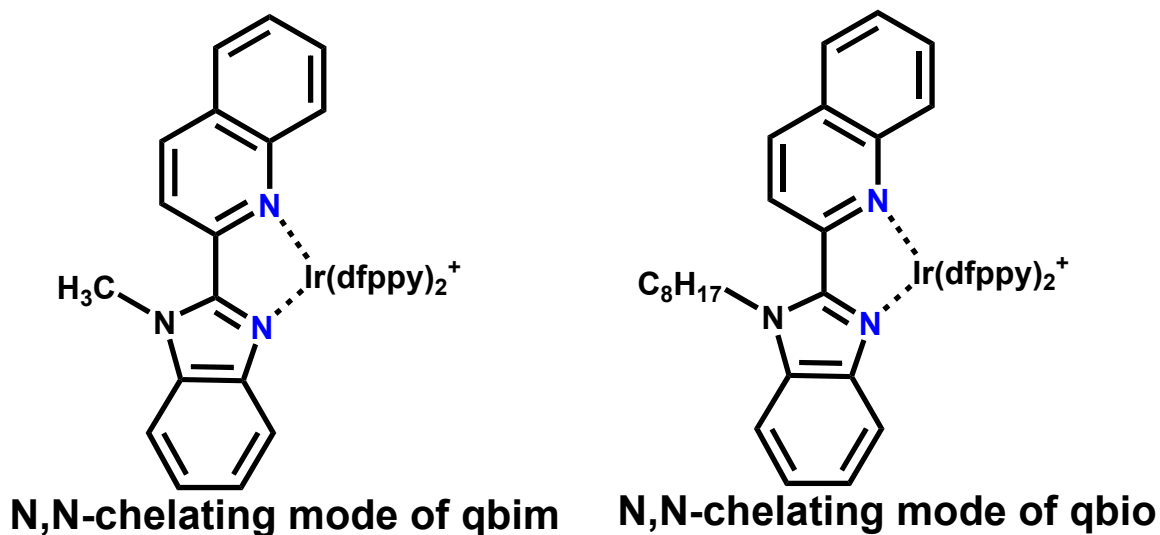

Scheme S9

**Table S1** UV-vis absorption bands of qbiH, qbim, qbio and compounds **1-4** in CH<sub>2</sub>Cl<sub>2</sub> at room temperature.

| Compound | absorption band (nm)         |
|----------|------------------------------|
| qbiH     | 245, 286, 336-350            |
| qbim     | 243, 284, 336-348            |
| qbio     | 243, 285, 336-348            |
| <b>1</b> | 251, 299, 362, a tail to 430 |
| <b>2</b> | 252, 302, 365, a tail to 430 |
| <b>3</b> | 252, 302, 365, a tail to 430 |
| <b>4</b> | 245, 298, 386, a tail to 454 |

**Table S2** Emission data of qbiH, qbim, qbio and **1-4** in CH<sub>2</sub>Cl<sub>2</sub> at room temperature.

| Compound | emission wavelength (nm) at room temperature | quantum yield in CH <sub>2</sub> Cl <sub>2</sub> | luminescence lifetimes (ns) |
|----------|----------------------------------------------|--------------------------------------------------|-----------------------------|
| qbiH     | 389                                          | -                                                | -                           |
| qbim     | 386                                          | -                                                | -                           |
| qbio     | 386                                          | -                                                | -                           |
| <b>1</b> | 558, 585                                     | 14%                                              | 1018                        |
| <b>2</b> | 572, 600                                     | 16%                                              | 956                         |
| <b>3</b> | 573, 600                                     | 18%                                              | 1002                        |
| <b>4</b> | 546                                          | 3.2%                                             | 377                         |

**Table S3** Emission data of **1-4** C<sub>2</sub>H<sub>5</sub>OH-CH<sub>3</sub>OH (v/v = 3/1) at 77 K.

| Compound | emission wavelength (nm) at 77 K |
|----------|----------------------------------|
| <b>1</b> | 528, 570                         |
| <b>2</b> | 536, 578                         |
| <b>3</b> | 537, 579                         |
| <b>4</b> | 523, 563                         |

**Table S4** Emission data of the solid-state samples of **1-4** at room temperature ( $\lambda_{\text{ex}} = 370$  nm for **1** and **4**, and  $\lambda_{\text{ex}} = 380$  nm for **2** and **3**).

| Compound | emission wavelength (nm) |
|----------|--------------------------|
| <b>1</b> | 542, 572, 611            |
| <b>2</b> | 553, 581, 612            |
| <b>3</b> | 544, 578, 630            |
| <b>4</b> | 595, 633                 |

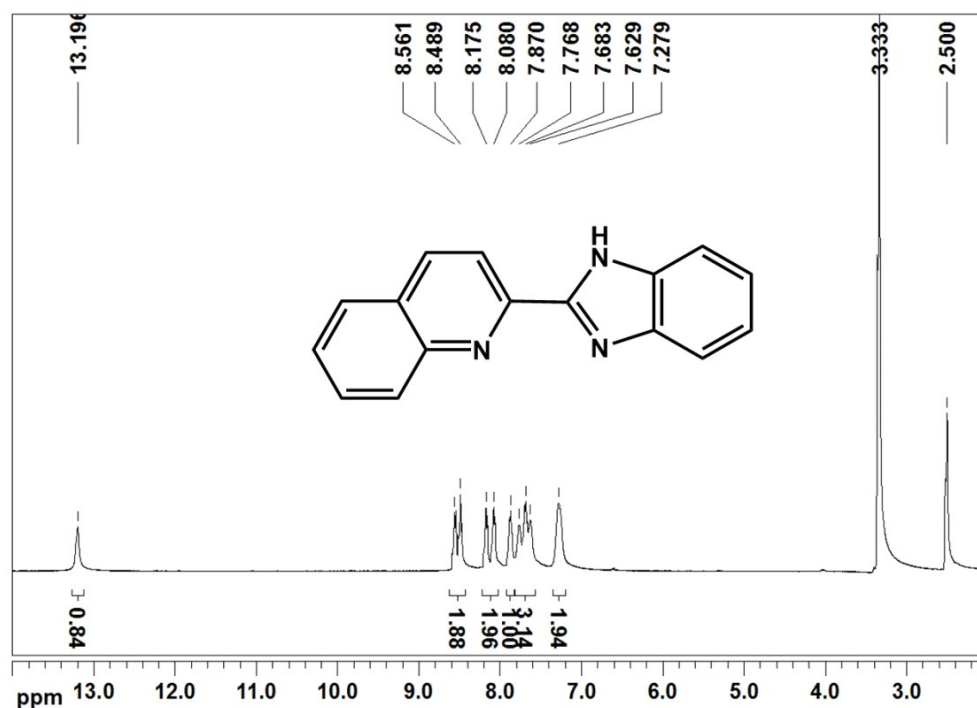

**Fig. S1** <sup>1</sup>H NMR spectrum of qbiH (500 MHz, DMSO-*d*<sub>6</sub>).

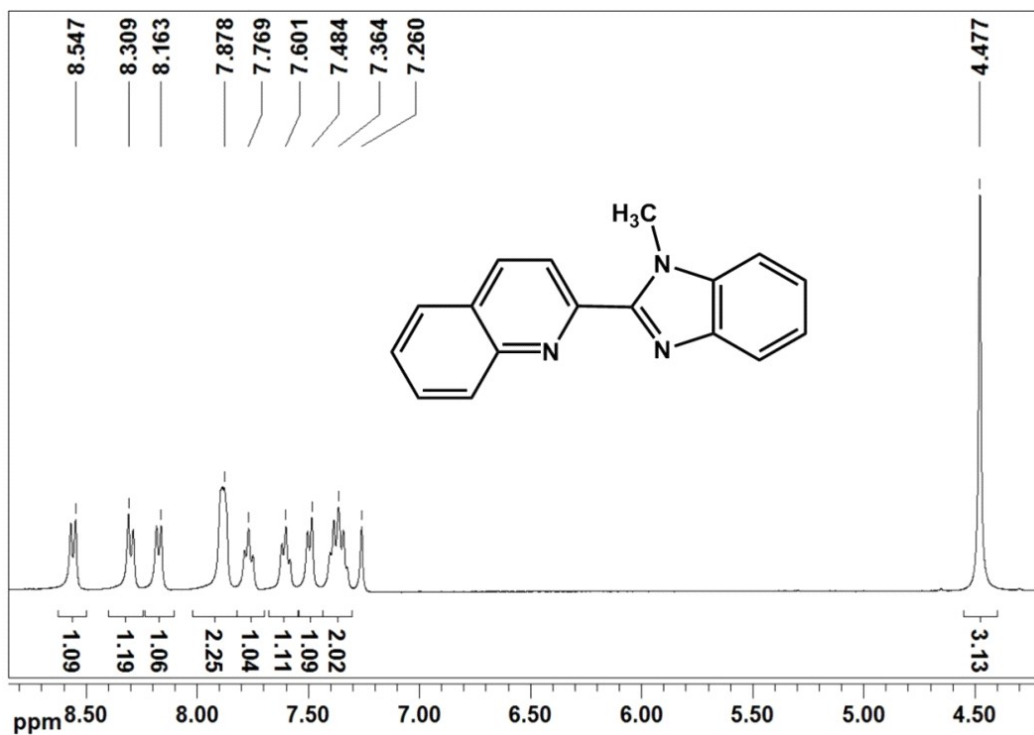

Fig. S2  $^1\text{H}$  NMR spectrum of qbim (300 MHz,  $\text{CDCl}_3$ ).

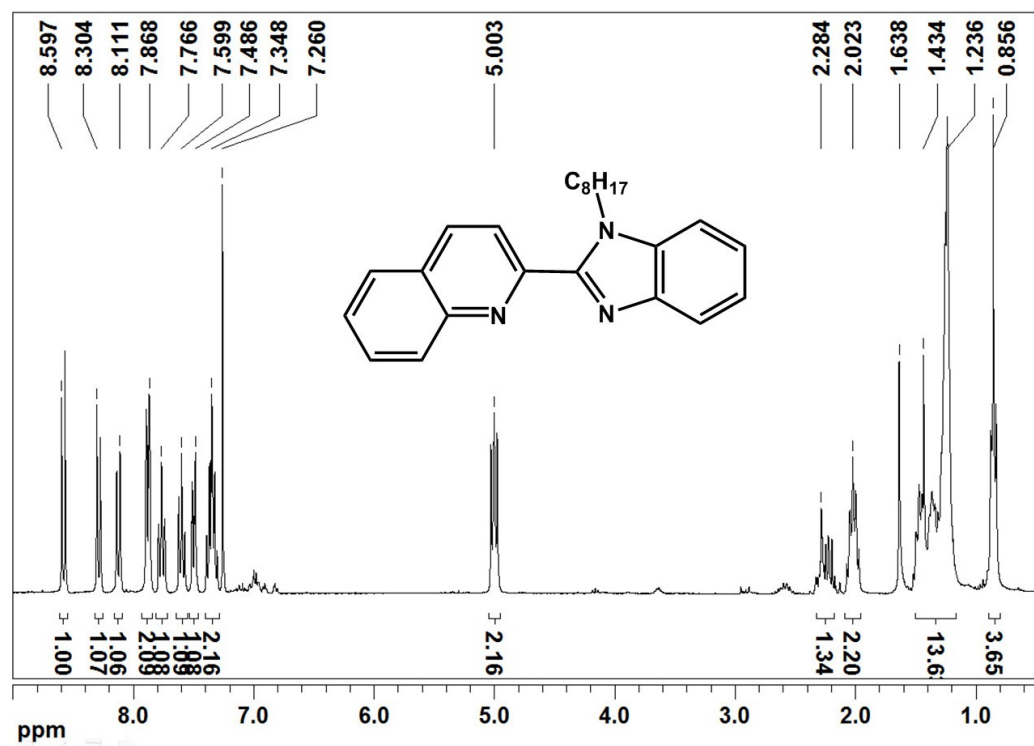

Fig. S3  $^1\text{H}$  NMR spectrum of qbio (300 MHz,  $\text{CDCl}_3$ ).

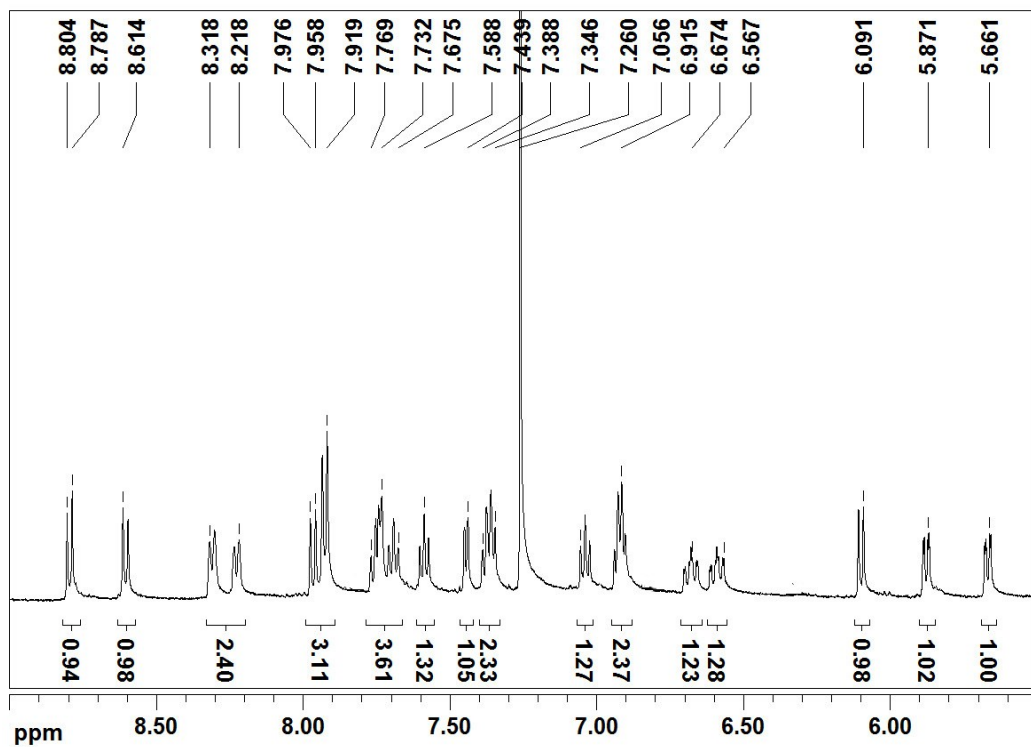

Fig. S4  $^1\text{H}$  NMR spectrum of **1** (500 MHz,  $\text{CDCl}_3$ ).

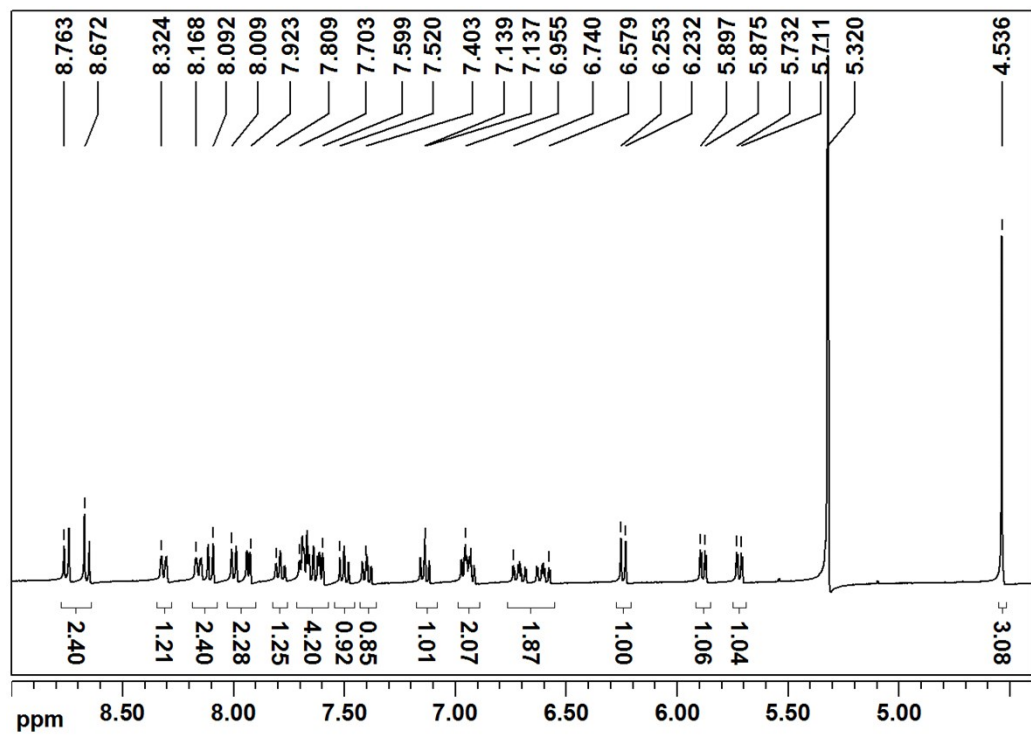

Fig. S5  $^1\text{H}$  NMR spectrum of **2** (300 MHz,  $\text{CD}_2\text{Cl}_2$ ).

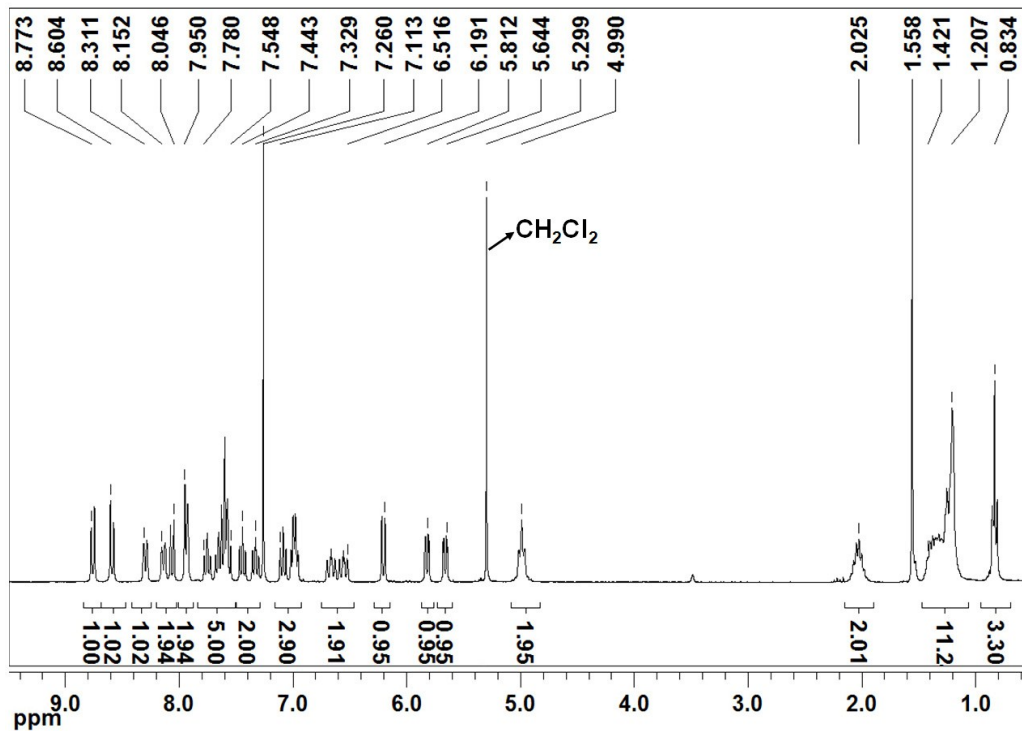

Fig. S6  $^1\text{H}$  NMR spectrum of **3** (300 MHz,  $\text{CDCl}_3$ ).

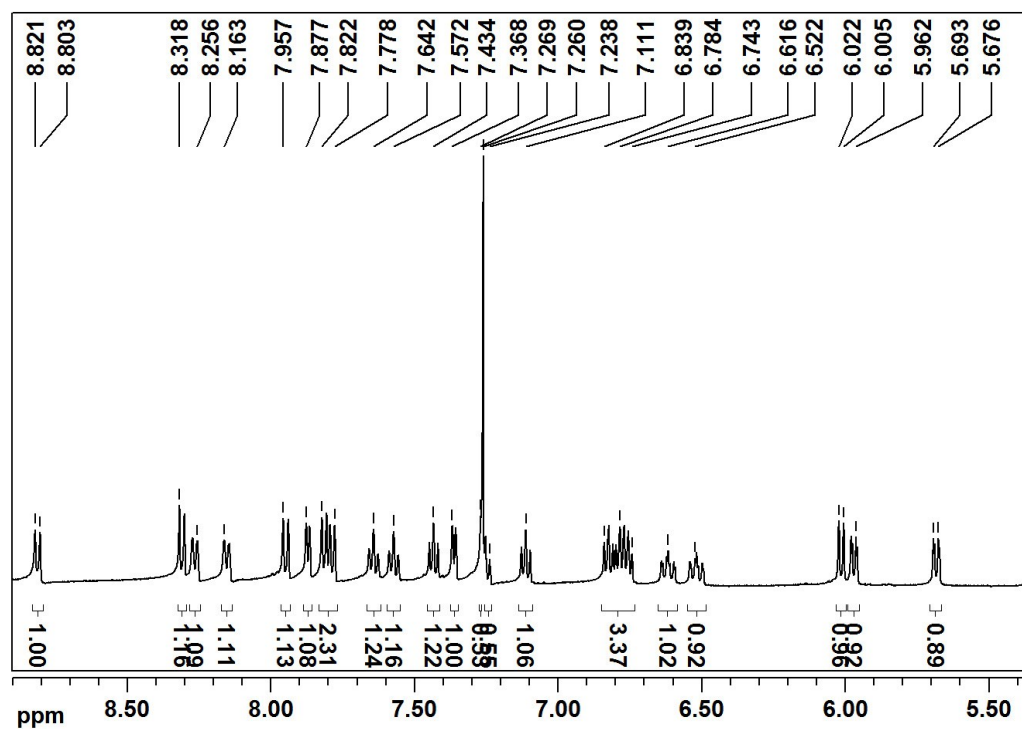

Fig. S7  $^1\text{H}$  NMR spectrum of **4** (500 MHz,  $\text{CDCl}_3$ ).



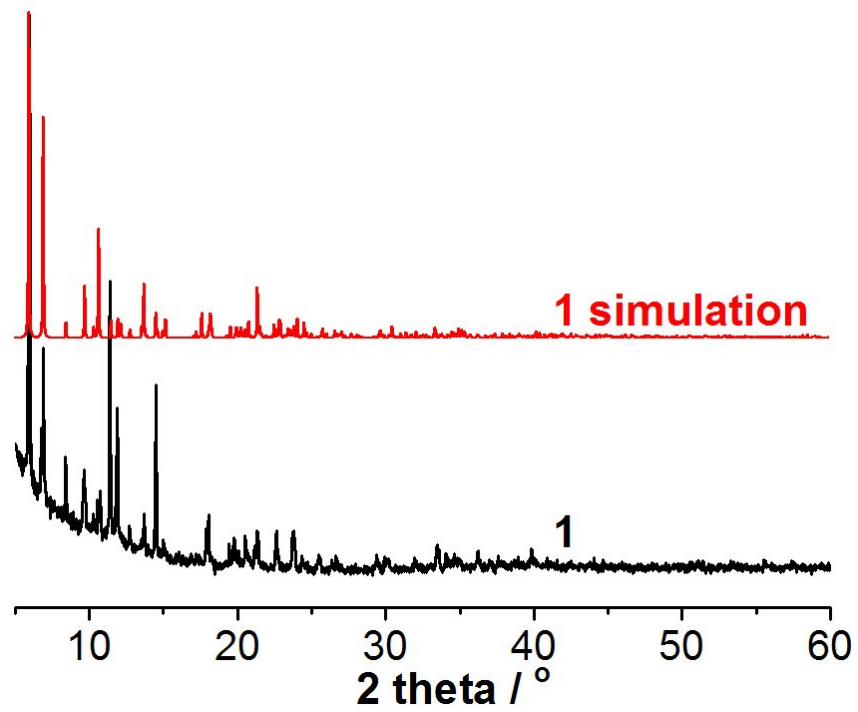

Fig. S8 Experimental and simulated XRD patterns of 1.

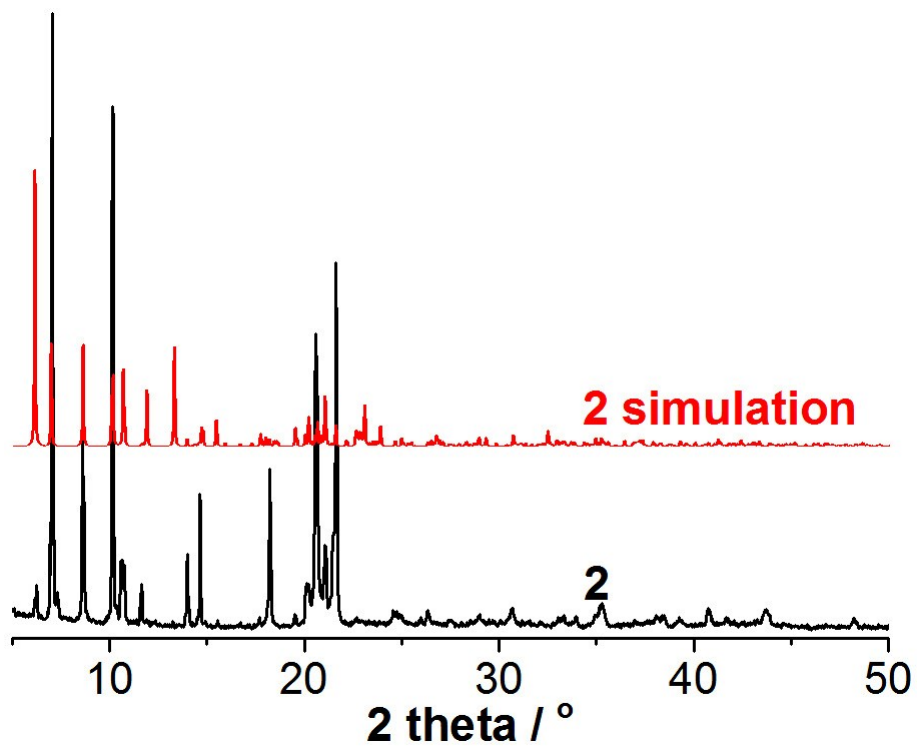

Fig. S9 Experimental and simulated XRD patterns of 2.

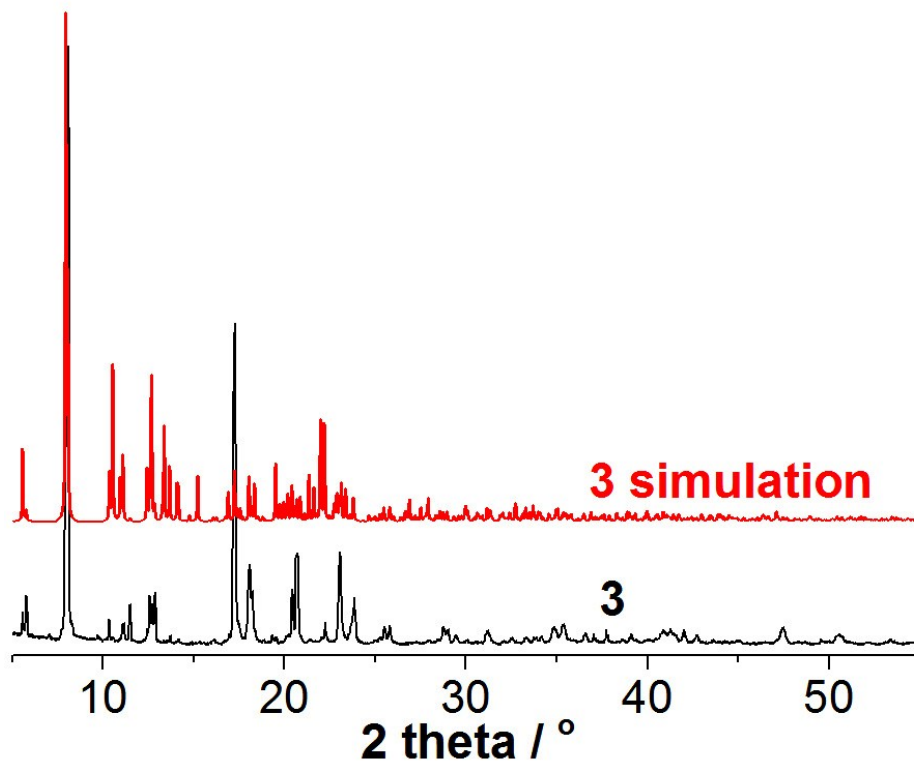

Fig. S10 Experimental and simulated XRD patterns of 3.

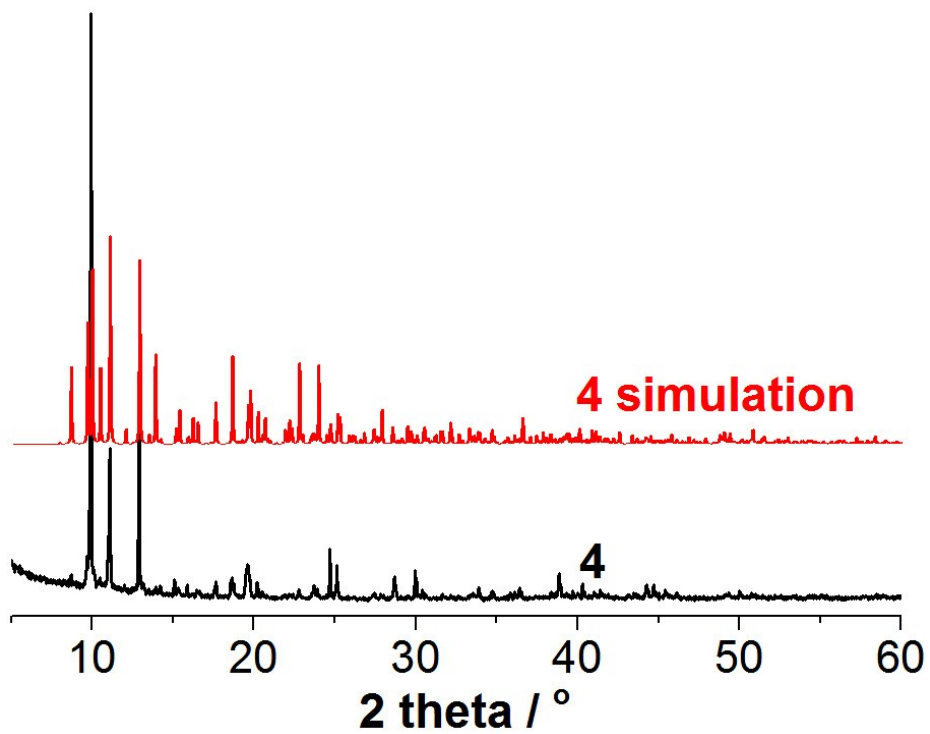

Fig. S11 Experimental and simulated XRD patterns of 4.

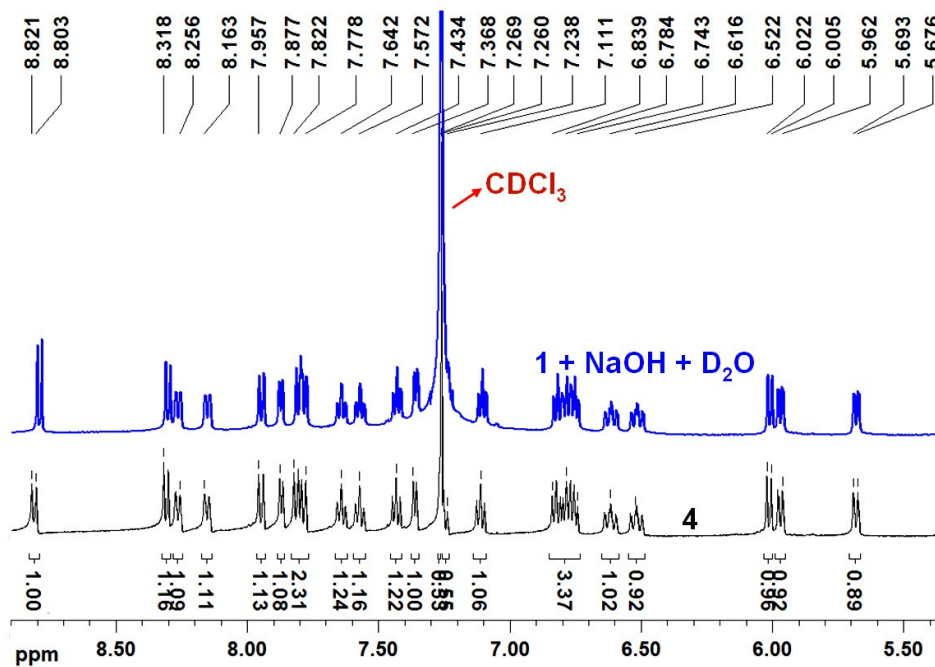

Fig. S12 <sup>1</sup>H NMR spectrum of **1** (500 MHz, CDCl<sub>3</sub>) after adding a D<sub>2</sub>O solution of NaOH, and <sup>1</sup>H NMR spectrum of **4** (500 MHz, CDCl<sub>3</sub>).

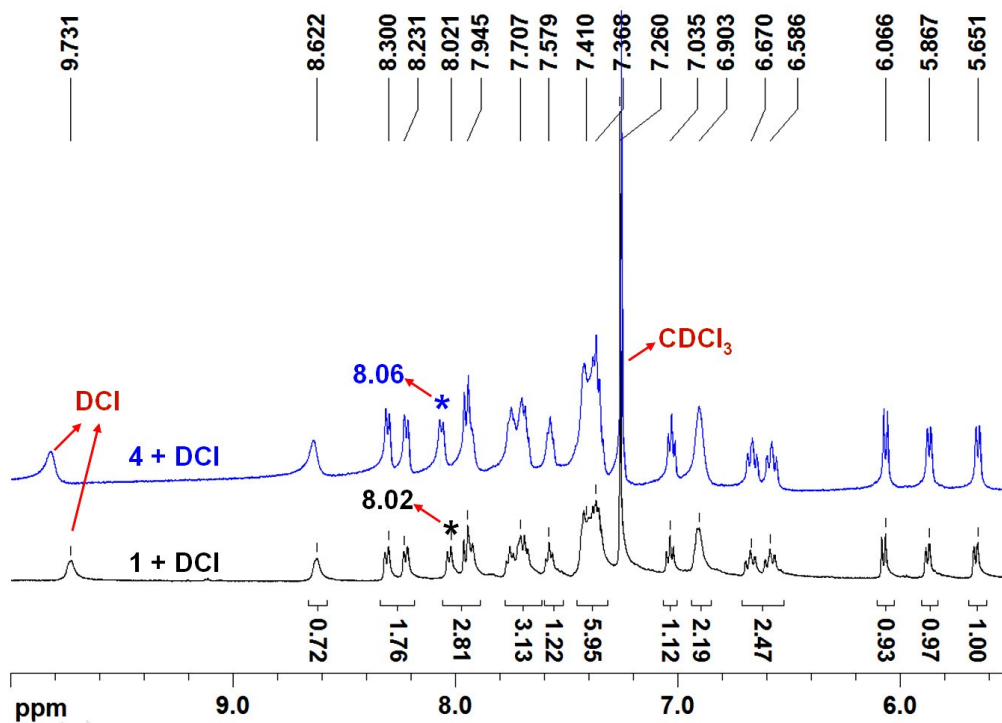

Fig. S13 <sup>1</sup>H NMR spectra of **1** and **4** (500 MHz, CDCl<sub>3</sub>) after adding DCl.

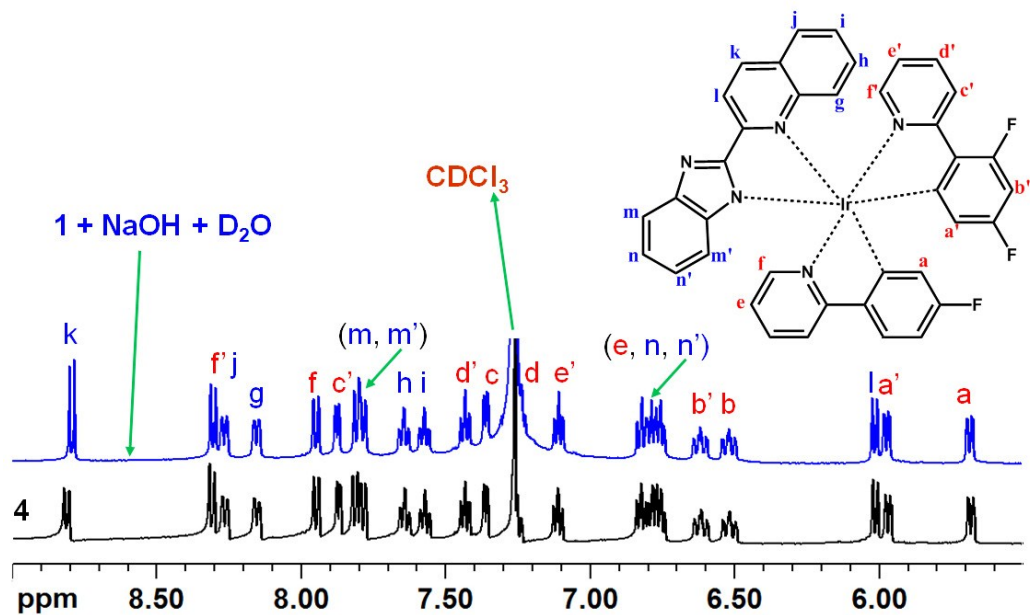

**Fig. S14** The tentative assignment of different proton resonances in the  $^1\text{H}$  NMR spectra of **1** and **1+NaOH+D<sub>2</sub>O** (Letters a-n are used to indicate different H atoms).

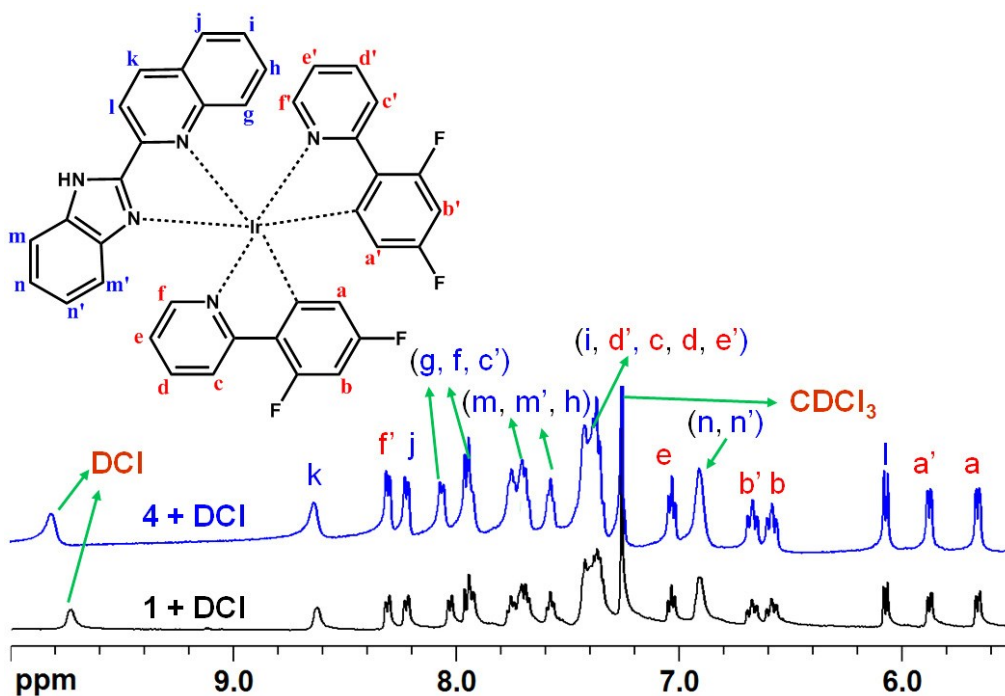

**Fig. S15** The tentative assignment of different proton resonances in the  $^1\text{H}$  NMR spectra of **4+DCI** and **1+DCI** (a-n are used to indicate different H atoms).

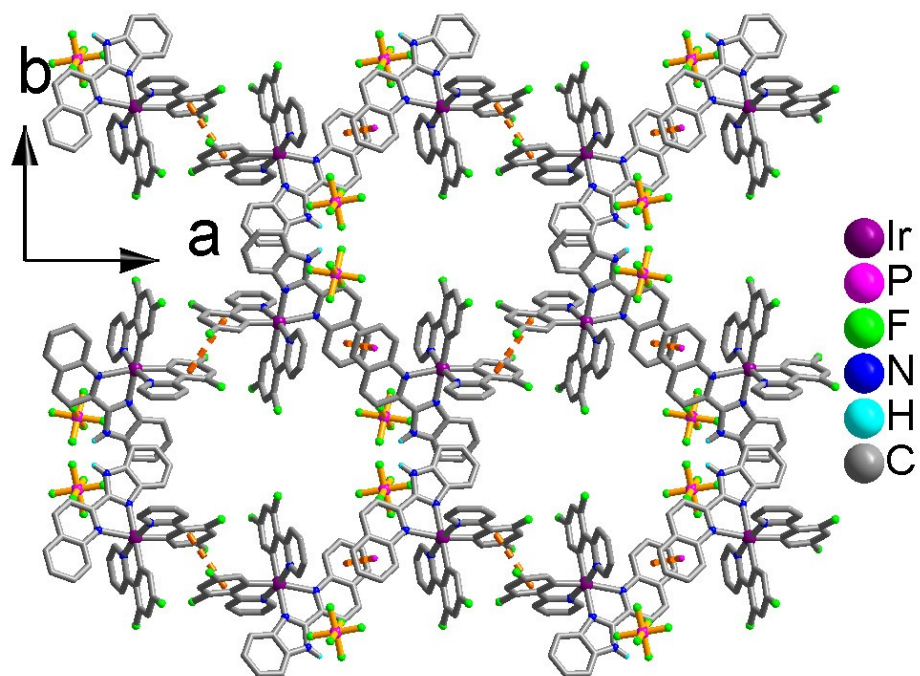

Fig. S16 Packing structure of 1.

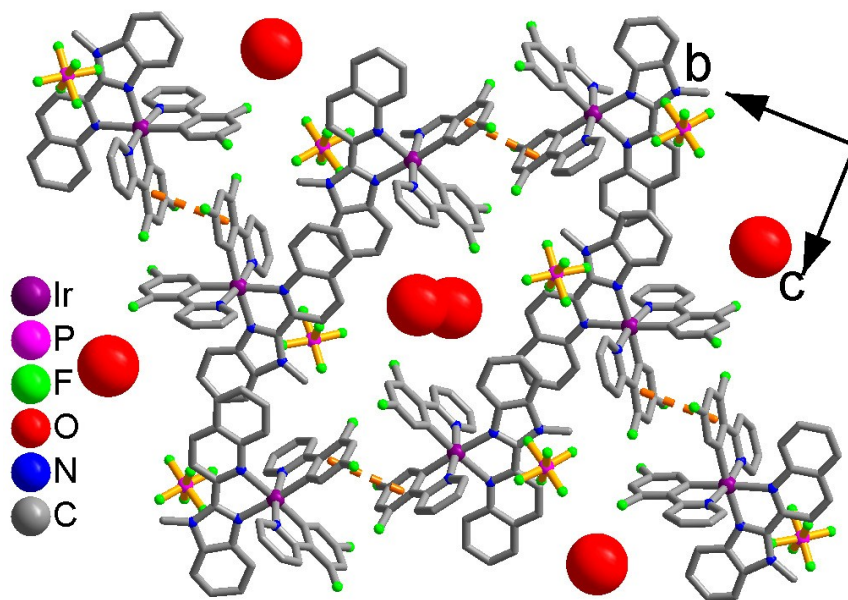

Fig. S17 Packing structure of 2. Big red balls are O atoms from H<sub>2</sub>O molecules.

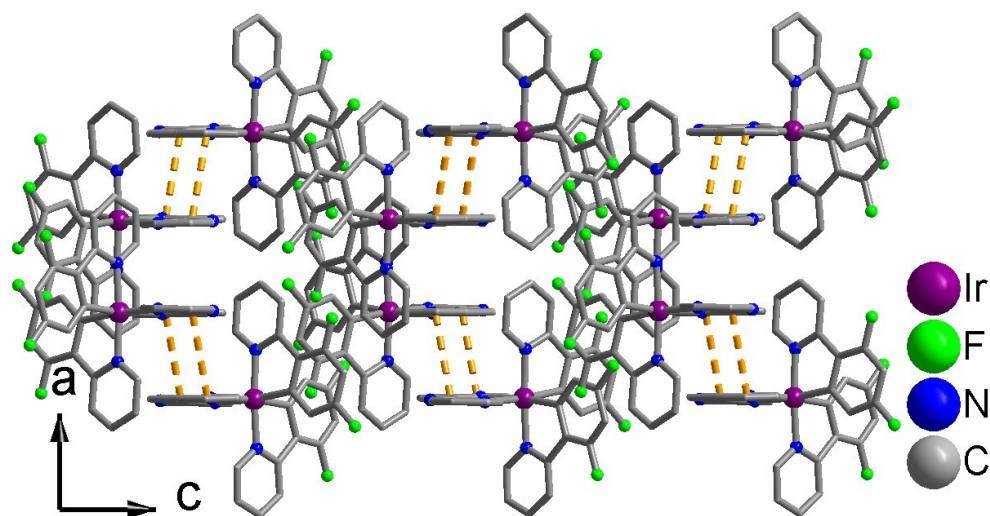

Fig. S18 The supramolecular dimers in 4 stacking through van der Waals interactions.

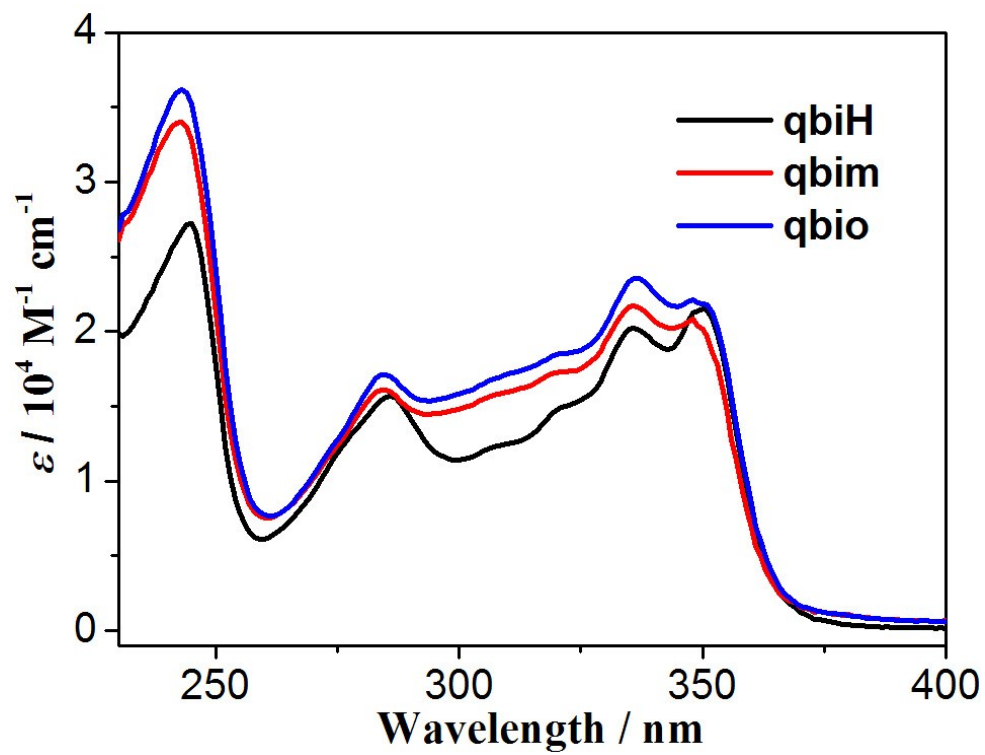

Fig. S19 UV-vis absorption spectra of qbiH, qbim and qbio in  $\text{CH}_2\text{Cl}_2$ .

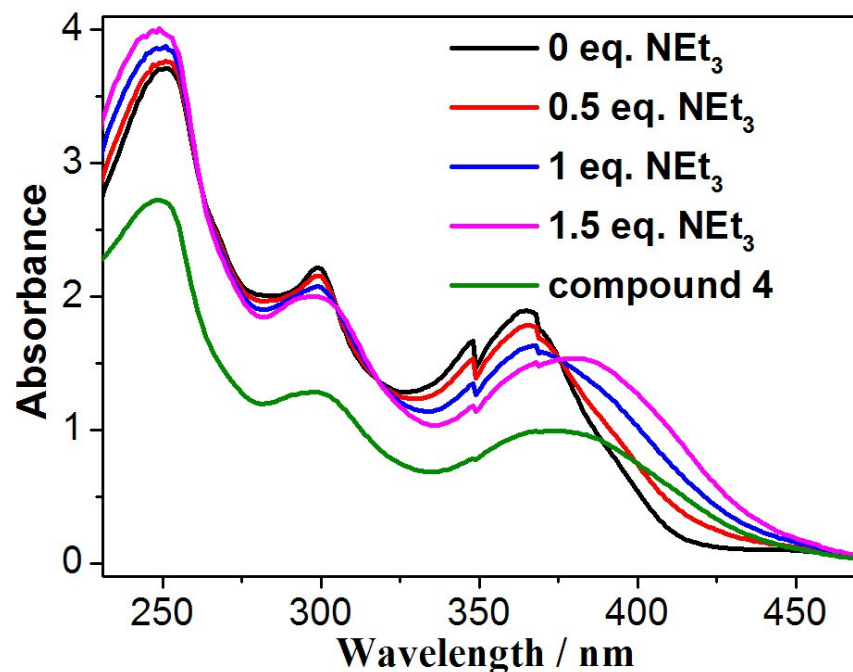

**Fig. S20** UV-vis absorption spectra changes of **1** in CH<sub>2</sub>Cl<sub>2</sub> ( $c = 4 \times 10^{-5}$  M) upon adding NEt<sub>3</sub>, and UV-vis absorption spectrum of compound **4** in CH<sub>2</sub>Cl<sub>2</sub> ( $c = 4 \times 10^{-5}$  M).

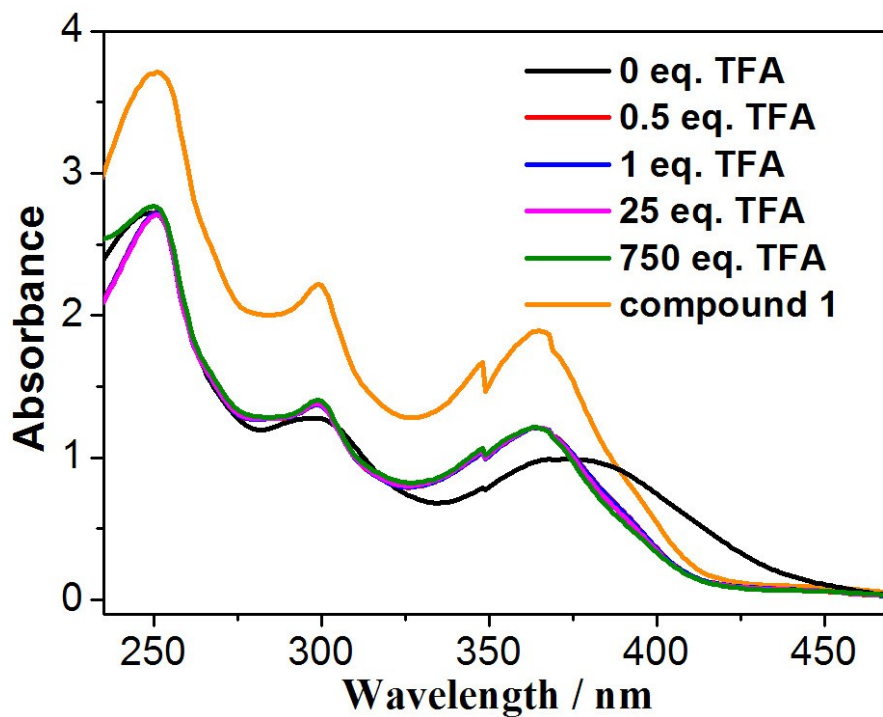

**Fig. S21** UV-vis absorption spectra changes of **4** in CH<sub>2</sub>Cl<sub>2</sub> ( $c = 4 \times 10^{-5}$  M) upon adding TFA, and UV-vis absorption spectrum of compound **1** in CH<sub>2</sub>Cl<sub>2</sub> ( $c = 4 \times 10^{-5}$  M).

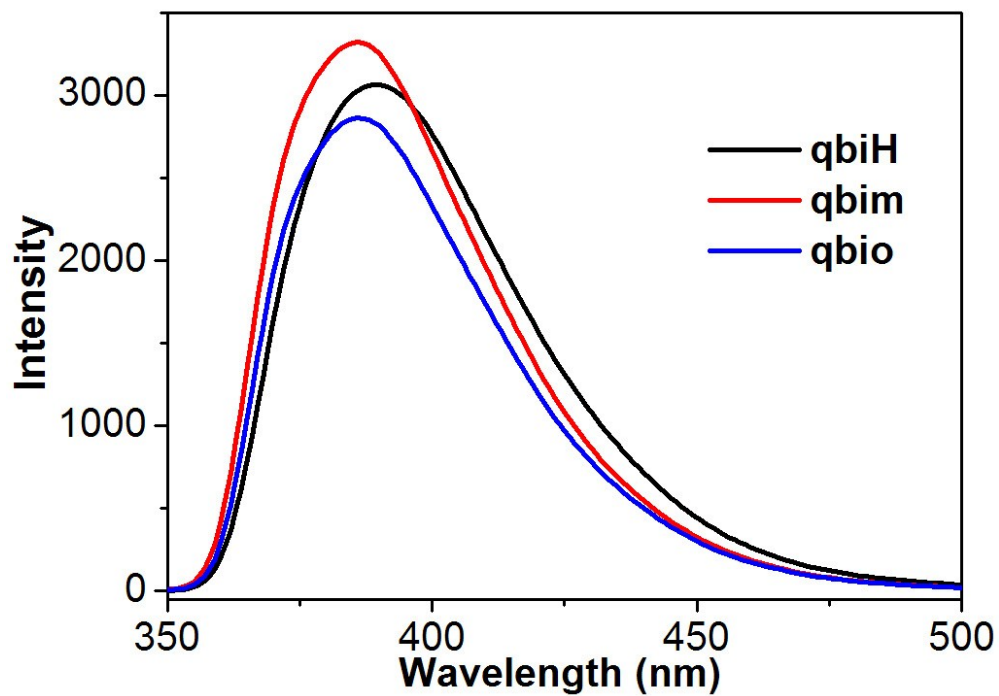

**Fig. S22** Luminescence spectra of qbiH, qbim and qbio in  $\text{CH}_2\text{Cl}_2$  ( $c = 1.0 \times 10^{-4} \text{ M}$ ,  $\lambda_{\text{ex}} = 345 \text{ nm}$ ) at room temperature.

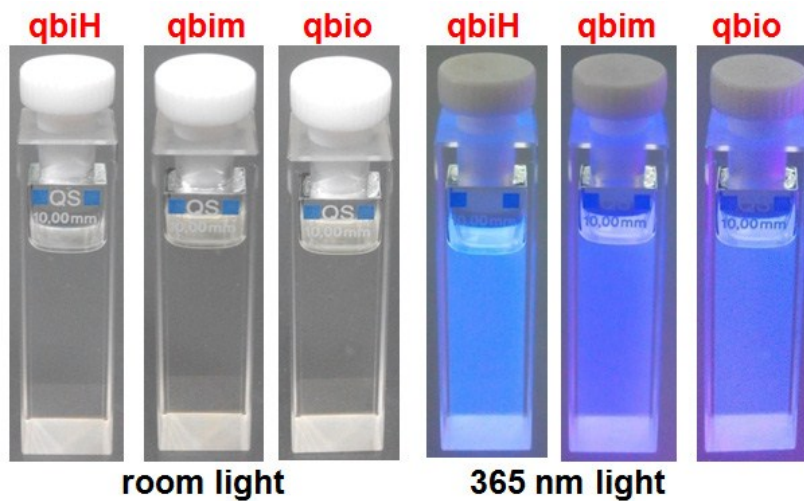

**Fig. S23** The photographs of qbiH, qbim and qbio in  $\text{CH}_2\text{Cl}_2$  under room light or 365 nm light.



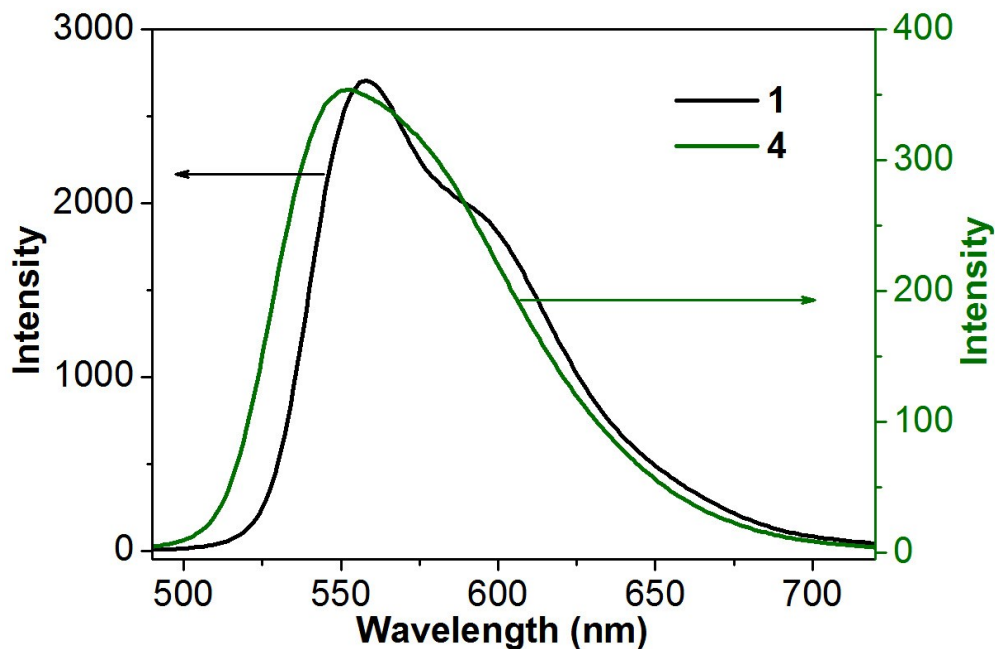

**Fig. S24** Luminescence spectra of **1** and **4** in  $\text{CH}_2\text{Cl}_2$  ( $c = 4 \times 10^{-5}$  M) at room temperature.

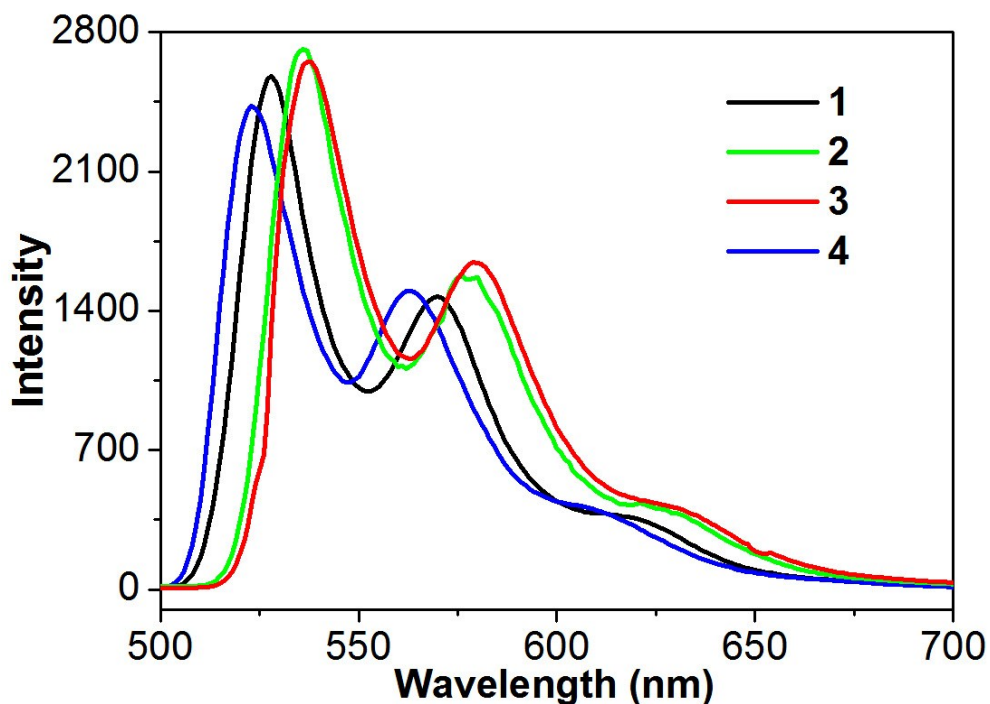

**Fig. S25** Phosphorescence spectra of **1-4** in  $\text{C}_2\text{H}_5\text{OH}-\text{CH}_3\text{OH}$  ( $v/v = 3/1$ ) at 77 K ( $c = 1.0 \times 10^{-4}$  M,  $\lambda_{\text{ex}} = 370$  nm).

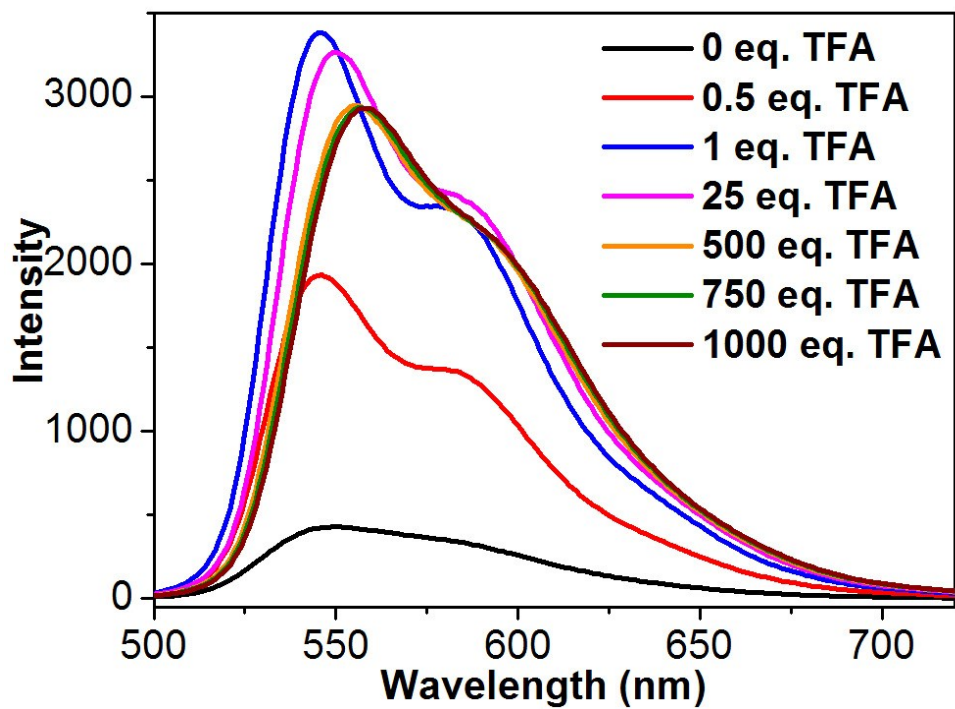

**Fig. S26** Luminescence spectra changes of **4** in CH<sub>2</sub>Cl<sub>2</sub> ( $c = 4 \times 10^{-5}$  M,  $\lambda_{\text{ex}} = 370$  nm) upon adding TFA.

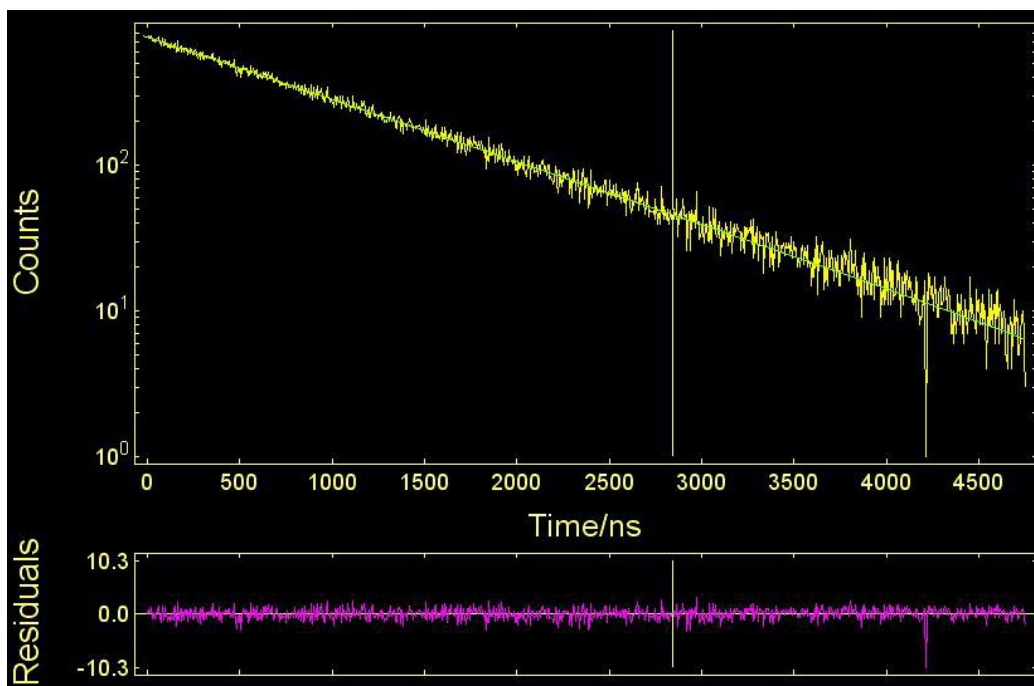

**Fig. S27** The emission decay of compound **1** in CH<sub>2</sub>Cl<sub>2</sub>.

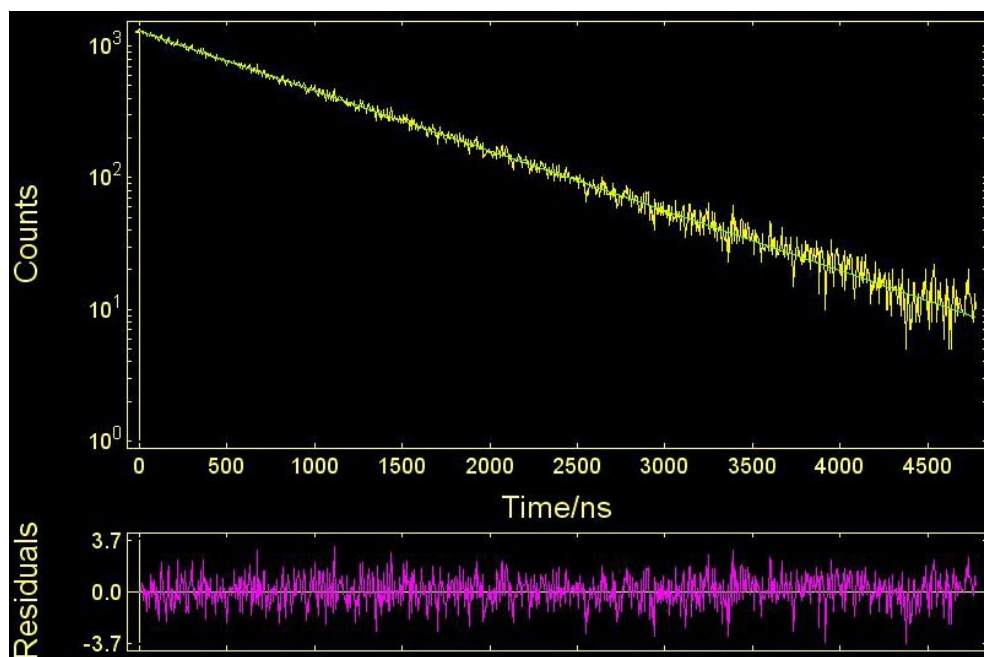

**Fig. S28** The emission decay of compound **2** in CH<sub>2</sub>Cl<sub>2</sub>.

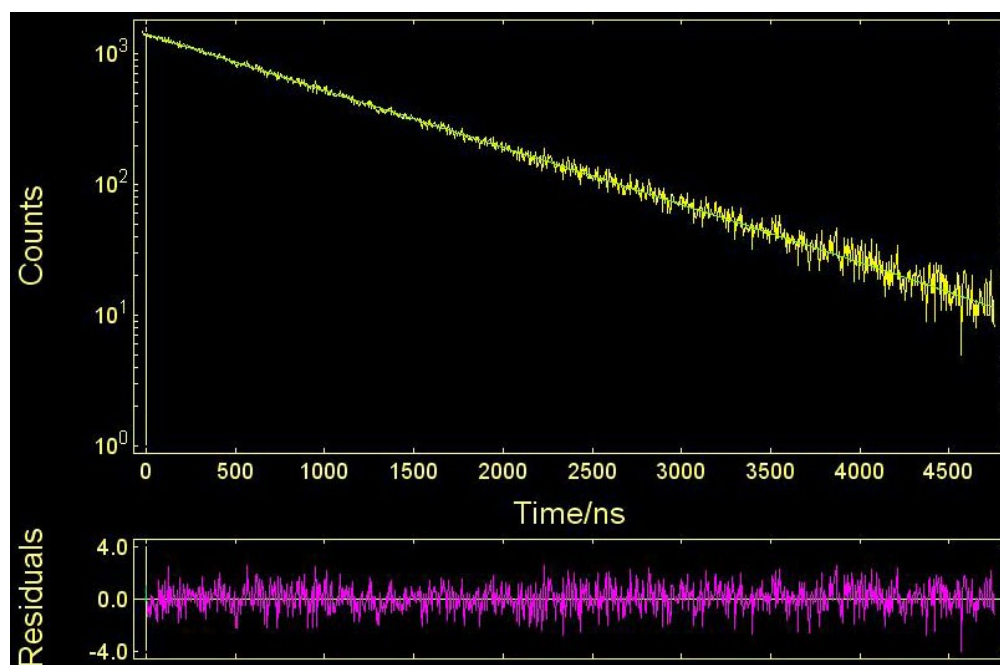

**Fig. S29** The emission decay of compound **3** in CH<sub>2</sub>Cl<sub>2</sub>.

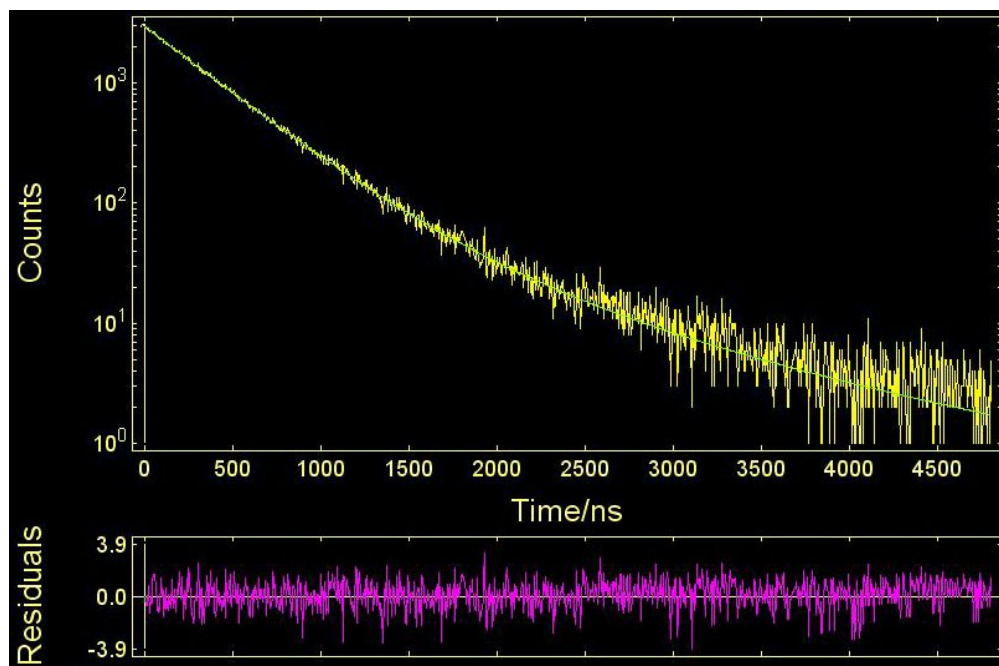

**Fig. S30** The emission decay of compound **4** in  $\text{CH}_2\text{Cl}_2$ .
